# Supplementary material
Source: Research Square preprint supplement (doi:10.21203/rs.3.rs-9126801/v1)
Supplement: Supplementary file 1 [file 391d0cf102457d7ce07457fa.pdf]

# Questionnaire for Lifestyle and Medical Information

---

## Section 1. Lifestyle Variables

### 1.1 Physical Activity

How many days per week do you engage in physical activity or structured exercise?  
\_\_\_\_\_ days/week

What is the average duration of each session? \_\_\_\_\_ minutes/session

How would you describe the intensity of your usual physical activity?

- Light (e.g., walking, low effort activities)
- Moderate (e.g., brisk walking, gym training)
- Vigorous (e.g., running, high-intensity training)

How many sessions of physical activity do you usually perform per week?

- <3 sessions/week
- ≥3 sessions/week

### 1.2 Sleep

On average, how many hours do you sleep per night? \_\_\_\_\_ hours/night

### 1.3 Alcohol Consumption

Do you consume alcoholic beverages?  No  Yes

If yes, how frequently?  ≤1–2 times/week  ≥3 times/week

### 1.4 Smoking Status

What is your current smoking status?  Non-smoker  Smoker

### 1.5 Perceived Stress

On a scale from 0 to 10, how would you rate your current stress level? (0 = no stress, 10 = maximum stress) \_\_\_\_\_

## Section 2. Medical History and Pharmacological Treatment

### 2.1 Previous Diagnoses

Have you ever been diagnosed by a healthcare professional with any of the following conditions?

---

| <b>Condition</b> | <b>Yes <input type="checkbox"/></b> | <b>No <input type="checkbox"/></b> |
|------------------|-------------------------------------|------------------------------------|
| Hypertension     | <input type="checkbox"/>            | <input type="checkbox"/>           |
| Dyslipidaemia    | <input type="checkbox"/>            | <input type="checkbox"/>           |
| Diabetes         | <input type="checkbox"/>            | <input type="checkbox"/>           |

---

### 2.2 Current Pharmacological Treatment

Are you currently taking any of the following medications?

---

| <b>Medication Type</b> | <b>Yes <input type="checkbox"/></b> | <b>No <input type="checkbox"/></b> |
|------------------------|-------------------------------------|------------------------------------|
| Antihypertensive drugs | <input type="checkbox"/>            | <input type="checkbox"/>           |
| Lipid-lowering drugs   | <input type="checkbox"/>            | <input type="checkbox"/>           |
| Antidiabetic drugs     | <input type="checkbox"/>            | <input type="checkbox"/>           |

---
